# Supplementary material for: Human primitive brain displays negative mitochondrial-nuclear expression correlation of respiratory genes
Source: HighWire-hosted journal article supplement (doi:10.1101/gr.226324.117), 2018-06-14
Supplement: Supplemental_Table_S1.docx [file Supplemental_Table_S1.docx]

| Complex I | | Complex II | | Complex III | | Complex IV | | Complex V | |
| --- | --- | --- | --- | --- | --- | --- | --- | --- | --- |
| Name | Enasmbl ID | Name | Enasmbl ID | Name | Enasmbl ID | Name | Enasmbl ID | Name | Enasmbl ID |
| Structural genes | | Structural genes | | Structural genes | | Structural genes | | Structural genes | |
| *MT-ND1* | ENSG00000198888 | *SDHA* | ENSG00000073578 | *MT-CYB* | ENSG00000198727 | *MT-CO1* | ENSG00000198804 | *MT-ATP6* | ENSG00000198899 |
| *MT-ND2* | ENSG00000198763 | *SDHB* | ENSG00000117118 | *CYC1* | ENSG00000179091 | *MT-CO2* | ENSG00000198712 | *MT-ATP8* | ENSG00000228253 |
| *MT-ND3* | ENSG00000198840 | *SDHC* | ENSG00000143252 | *UQCRB* | ENSG00000156467 | *MT-CO3* | ENSG00000198938 | *ATP5F1A* | ENSG00000152234 |
| *MT-ND4* | ENSG00000198886 | *SDHD* | ENSG00000204370 | *UQCRC1* | ENSG00000010256 | *NDUFA4* | ENSG00000189043 | *ATP5F1B* | ENSG00000110955 |
| *MT-ND4L* | ENSG00000212907 | Assembly factors | | *UQCRC2* | ENSG00000140740 | *COX4I1* | ENSG00000131143 | *ATP5F1C* | ENSG00000165629 |
| *MT-ND5* | ENSG00000198786 | *SDHAF1* | ENSG00000205138 | *UQCRFS1* | ENSG00000169021 | *COX4I2* | ENSG00000131055 | *ATP5F1D* | ENSG00000099624 |
| *MT-ND6* | ENSG00000198695 | *SDHAF2* | ENSG00000167985 | *UQCRH* | ENSG00000173660 | *COX5A* | ENSG00000178741 | *ATP5F1E* | ENSG00000124172 |
| *NDUFS1* | ENSG00000023228 | *SDHAF3* | ENSG00000196636 | *UQCRQ* | ENSG00000164405 | *COX5B* | ENSG00000135940 | *ATP5PB* | ENSG00000116459 |
| *NDUFS2* | ENSG00000158864 | *SDHAF4* | ENSG00000154079 | *UQCR10* | ENSG00000184076 | *COX6A1* | ENSG00000111775 | *ATP5MC1* | ENSG00000159199 |
| *NDUFS3* | ENSG00000213619 |  |  | *UQCR11* | ENSG00000127540 | *COX6A2* | ENSG00000156885 | *ATP5MC2* | ENSG00000135390 |
| *NDUFS7* | ENSG00000115286 |  |  | Assembly factors | | *COX6B1* | ENSG00000126267 | *ATP5MC3* | ENSG00000154518 |
| *NDUFS8* | ENSG00000110717 |  |  | *BCS1L* | ENSG00000074582 | *COX6B2* | ENSG00000160471 | *ATP5PD* | ENSG00000167863 |
| *NDUFV1* | ENSG00000167792 |  |  | *UQCC1* | ENSG00000101019 | *COX6C* | ENSG00000164919 | *ATP5ME* | ENSG00000169020 |
| *NDUFV2* | ENSG00000178127 |  |  | *UQCC2* | ENSG00000137288 | *COX7A1* | ENSG00000161281 | *ATP5PF* | ENSG00000154723 |
| *NDUFAB1* | ENSG00000004779 |  |  | *UQCC3* | ENSG00000204922 | *COX7A2* | ENSG00000112695 | *ATP5MF* | ENSG0000024146 |
| *NDUFA1* | ENSG00000125356 |  |  |  |  | *COX7A2L* | *ENSG00000115944* | *ATP5MG* | ENSG00000167283 |
| *NDUFA2* | ENSG00000131495 |  |  |  |  | *COX7B* | ENSG00000131174 | *ATP5MGL* | ENSG00000249222 |
| *NDUFA3* | ENSG00000170906 |  |  |  |  | *COX7B2* | ENSG00000170516 | *ATP5PO* | ENSG00000241837 |
| *NDUFA5* | ENSG00000128609 |  |  |  |  | *COX7C* | ENSG00000127184 | **ATP5IF1* | ENSG00000130770 |
| *NDUFA6* | ENSG00000184983 |  |  |  |  | *COX8A* | ENSG00000176340 | [*ATP5MPL*](https://www.genenames.org/cgi-bin/gene_symbol_report?hgnc_id=1188) | *ENSG00000156411* |
| *NDUFA7* | ENSG00000267855 |  |  |  |  | *COX8C* | ENSG00000187581 | [*ATP5MD*](https://www.genenames.org/cgi-bin/gene_symbol_report?hgnc_id=30889) | *ENSG00000173915* |
| *NDUFA8* | ENSG00000119421 |  |  |  |  | Assembly factors | | Assembly factors | |
| *NDUFA9* | ENSG00000139180 |  |  |  |  | *COA1* | ENSG00000106603 | *ATPAF1* | ENSG00000123472 |
| *NDUFA10* | ENSG00000130414 |  |  |  |  | *COA3* | ENSG00000183978 | *ATPAF2* | ENSG00000171953 |
| *NDUFA11* | ENSG00000174886 |  |  |  |  | *COA4* | ENSG00000181924 |  |  |
| *NDUFA12* | ENSG00000184752 |  |  |  |  | *COA5* | ENSG00000183513 |  |  |
| *NDUFA13* | ENSG00000186010 |  |  |  |  | *COA6* | ENSG00000168275 |  |  |
| *NDUFB1* | ENSG00000183648 |  |  |  |  | *COA7* | ENSG00000162377 |  |  |
| *NDUFB2* | ENSG00000090266 |  |  |  |  | *COX10* | ENSG00000006695 |  |  |
| *NDUFB3* | ENSG00000119013 |  |  |  |  | *COX11* | ENSG00000166260 |  |  |
| *NDUFB4* | ENSG00000065518 |  |  |  |  | *SURF1* | ENSG00000148290 |  |  |
| *NDUFB5* | ENSG00000136521 |  |  |  |  | *COX14* | ENSG00000178449 |  |  |
| *NDUFB6* | ENSG00000165264 |  |  |  |  | *COX15* | ENSG00000014919 |  |  |
| *NDUFB7* | ENSG00000099795 |  |  |  |  | *COX17* | ENSG00000138495 |  |  |
| *NDUFB8* | ENSG00000166136 |  |  |  |  | *COX18* | ENSG00000163626 |  |  |
| *NDUFB9* | ENSG00000147684 |  |  |  |  | *COX19* | ENSG00000240230 |  |  |
| *NDUFB10* | ENSG00000140990 |  |  |  |  | *COX20* | ENSG00000203667 |  |  |
| *NDUFB11* | ENSG00000147123 |  |  |  |  | *SCO1* | ENSG00000133028 |  |  |
| *NDUFC1* | ENSG00000109390 |  |  |  |  | *SCO2* | ENSG00000130489 |  |  |
| *NDUFC2* | ENSG00000151366 |  |  |  |  |  |  |  |  |
| *NDUFS4* | ENSG00000164258 |  |  |  |  |  |  |  |  |
| *NDUFS5* | ENSG00000168653 |  |  |  |  |  |  |  |  |
| *NDUFS6* | ENSG00000145494 |  |  |  |  |  |  |  |  |
| *NDUFV3* | ENSG00000160194 |  |  |  |  |  |  |  |  |
| Assembly factors | |  |  |  |  |  |  |  |  |
| *FOXRED1* | ENSG00000110074 |  |  |  |  |  |  |  |  |
| *NDUFAF1* | ENSG00000137806 |  |  |  |  |  |  |  |  |
| *NDUFAF2* | ENSG00000164182 |  |  |  |  |  |  |  |  |
| *NDUFAF3* | ENSG00000178057 |  |  |  |  |  |  |  |  |
| *NDUFAF4* | ENSG00000123545 |  |  |  |  |  |  |  |  |
| *NDUFAF5* | ENSG00000101247 |  |  |  |  |  |  |  |  |
| *NDUFAF6* | ENSG00000156170 |  |  |  |  |  |  |  |  |
| *NDUFAF7* | ENSG00000003509 |  |  |  |  |  |  |  |  |
| *NUBPL* | ENSG00000151413 |  |  |  |  |  |  |  |  |
| *TIMMDC1* | ENSG00000113845 |  |  |  |  |  |  |  |  |
| *TMEM126B* | ENSG00000171204 |  |  |  |  |  |  |  |  |
| *ACAD9* | ENSG00000177646 |  |  |  |  |  |  |  |  |
| *ECSIT* | ENSG00000130159 |  |  |  |  |  |  |  |  |

**Supplemental Table S1.** A list of OXPHOS genes analyzed in this study, following HUGO Gene Nomenclature Committee (HGNC). *ATP5IF1* is marked, as it is considered a regulatory, rather than a structural subunit. OXPHOS structural and assembly factors are indicated, along with their Ensembl accession numbers.
