# Supplementary material for: Human primitive brain displays negative mitochondrial-nuclear expression correlation of respiratory genes
Source: HighWire-hosted journal article supplement (doi:10.1101/gr.226324.117), 2018-06-14
Supplement: Supplemental_Table_S2.docx [file Supplemental_Table_S2.docx]

**Supplemental Table S2.**  List of genes in which there are differences in gene symbols between the GTEx and HGNC databases.

| HGNC symbol | GTEx symbol |
| --- | --- |
| *ATP5F1A* | *ATP5A1* |
| *ATP5F1B* | *APT5B* |
| *ATP5F1C* | *ATP5C1* |
| *ATP5F1D* | *ATP5D* |
| *ATP5F1E* | *ATP5E* |
| *ATP5MC1* | *ATP5G1* |
| *ATP5MC2* | *ATP5G2* |
| *ATP5MC3* | *ATP5G3* |
| *ATP5MD* | *USMG5* |
| *ATP5ME* | *ATP5I* |
| *ATP5PF* | *ATPGJ* |
| *ATP5MF* | *ATP5J2* |
| *ATP5MG* | *ATP5L* |
| *ATP5MGL* | *ATP5L2* |
| *ATP5PB* | *ATP5F1* |
| *ATP5PD* | *ATP5H* |
| *ATP5PO* | *ATP5O* |
| *ATP5IF1* | *ATPIF1* |
| *GAT3A* | *C21orf33* |
| *MRPL57* | *MRP63* |
| *MTERF3* | *MTERFD1* |
| *MRM2* | *FTSJ2* |
| *CAVIN1* | *RTRF* |
| *KYAT3* | *CCBL2* |
| *MRM3* | *RNMTC1* |
| *MTERF1* | *MTERF* |
| *MTERF2* | *MTERFD3* |
