# Supplementary material for: Human primitive brain displays negative mitochondrial-nuclear expression correlation of respiratory genes
Source: HighWire-hosted journal article supplement (doi:10.1101/gr.226324.117), 2018-06-14
Supplement: Supplemental_Table_S3.xlsx [file Supplemental_Table_S3.xlsx]

## Sheet: Sheet1
Supplemental Table S3. Sub-division of OXPHOS structural genes into the four expression correlation clusters.
Main OXPHOS	mtDNA	Lower similarity	Redundant paralogs
NDUFS2	MT-ND1	NDUFS4	COX6A1
NDUFS3	MT-ND2	NDUFC2	COX6A2
NDUFS7	MT-ND3	NDUFA11	COX4I2
NDUFS8	MT-ND4L	SDHC	COX7A1
NDUFV1	MT-ND4	SDHD	COX8C
NDUFV2	MT-ND5	COX7A2	COX7B2
NDUFAB1	MT-ND6	ATP5MC2	COX6B2
NDUFA1	MT-CYB	ATP5IF1	ATP5MGL
NDUFA2	MT-CO1	ATP5F1E	COX7A2L
NDUFA3	MT-CO2
NDUFA5	MT-CO3
NDUFA6	MT-ATP8
NDUFA7	MT-ATP6
NDUFA8
NDUFA9
NDUFA10
NDUFA12
NDUFA13
NDUFB1
NDUFB2
NDUFB3
NDUFB4
NDUFB5
NDUFB6
NDUFB7
NDUFB8
NDUFB9
NDUFB10
NDUFB11
NDUFC1
NDUFS5
NDUFS6
NDUFV3
SDHA
SDHB
CYC1
UQCRB
UQCRC1
UQCRC2
UQCRFS1
UQCRH
UQCRQ
UQCR10
UQCR11
NDUFA4
COX4I1
COX5A
COX5B
COX6B1
COX6C
COX7B
COX7C
COX8A
ATP5F1A
ATP5F1B
ATP5F1C
ATP5F1D
ATP5FPB
ATP5MC1
ATP5MC3
ATP5PD
ATP5ME
ATP5PF
ATP5MF
ATP5MG
ATP5PO
ATP5MPL
ATP5MD

## Sheet: Sheet2
MT-ND1	MT-ND2	MT-ND3	MT-ND4L	MT-ND4	MT-ND5	MT-ND6	MT-CYB	MT-CO1	MT-CO2	MT-CO3	MT-ATP8	MT-ATP6	NDUFS4	NDUFC2	NDUFA11	SDHC	SDHD	COX7A2	ATP5G2	ATP5IF1	ATP5E	COX6A1	COX6A2	COX4I2	COX7A1	COX8C	COX7B2	COX6B2	ATP5L2
