# Supplementary material for: Human primitive brain displays negative mitochondrial-nuclear expression correlation of respiratory genes
Source: HighWire-hosted journal article supplement (doi:10.1101/gr.226324.117), 2018-06-14
Supplement: Supplemental_Table_S4.docx [file Supplemental_Table_S4.docx]

**Supplemental Table S4.** Summary statistics of the expression differences between subunits within or between OXPHOS complexes.

| Complex | MWU | p-value | Median  intra-complex | Median  inter-complexes |
| --- | --- | --- | --- | --- |
| Total | 3544548 | 5.34E-05 | 0.634 | 0.629 |
| complex I | 980400 | 0.085991207 | 0.617 | 0.6117 |
| complex II | 1030 | 0.006850023 | 0.561 | 0.477 |
| complex III | 20584 | 0.135308863 | 0.655 | 0.638 |
| complex IV | 27588 | 3.17E-08 | 0.708 | 0.648 |
| complex V | 121456 | 0.000209578 | 0.661 | 0.632 |
