# Supplementary material for: Human primitive brain displays negative mitochondrial-nuclear expression correlation of respiratory genes
Source: HighWire-hosted journal article supplement (doi:10.1101/gr.226324.117), 2018-06-14
Supplement: Supplemental_Table_S5.xlsx [file Supplemental_Table_S5.xlsx]

## Sheet: DGF_TFs_for_fig
Supplemental Table S5. Coordinates of DNase I footprinting sites upstream to all human OXPHOS genes.
gene	start	end
ATP5F1A	-31	0
ATP5F1A	-271	-121
ATP5F1A	-516	-366
ATP5F1B	-118	0
ATP5F1B	-323	-173
ATP5F1B	-503	-353
ATP5F1C	-972	-822
ATP5F1C	-672	-522
ATP5F1C	-407	-257
ATP5F1C	-92	0
ATP5F1D	-808	-658
ATP5F1D	-443	-293
ATP5F1D	-108	0
ATP5F1E	-168	-18
ATP5F1E	-568	-418
ATP5PB	-622	-472
ATP5PB	-382	-232
ATP5PB	-222	-72
ATP5MC1	-1000	-897
ATP5MC1	-482	-332
ATP5MC1	-327	-177
ATP5MC1	-122	0
ATP5MC2	-238	-88
ATP5MC2	-598	-448
ATP5MC2	-858	-708
ATP5MC3	-40	0
ATP5MC3	-665	-515
ATP5PD	-176	-26
ATP5PD	-676	-526
ATP5PD	-956	-806
ATP5PD	-1000	-966
ATP5ME	-83	0
ATP5ME	-248	-98
ATP5ME	-483	-333
ATP5ME	-783	-633
ATP5ME	-988	-838
ATP5ME	-1000	-993
ATP5PF	-65	0
ATP5PF	-385	-235
ATP5PF	-645	-495
ATP5PF	-825	-675
ATP5MF	-86	0
ATP5MF	-511	-361
ATP5MG	-1000	-888
ATP5MG	-883	-733
ATP5MG	-643	-493
ATP5MG	-358	-208
ATP5MG	-123	0
ATP5MGL	-223	-73
ATP5PO	-72	0
ATP5IF1	-861	-711
ATP5IF1	-476	-326
ATP5IF1	-121	0
COX4I1	-1000	-897
COX4I1	-887	-737
COX4I1	-707	-557
COX4I1	-432	-282
COX4I1	-32	0
COX4I2	-265	-115
COX4I2	-50	0
COX5A	-95	0
COX5A	-635	-485
COX5B	-820	-670
COX5B	-540	-390
COX5B	-200	-50
COX6A1	-192	-42
COX6A2	-541	-391
COX6A2	-721	-571
COX6B1	-284	-134
COX6B1	-64	0
COX6B2	-172	-22
COX6B2	-352	-202
COX6B2	-532	-382
COX6B2	-687	-537
COX6C	-8	0
COX6C	-313	-163
COX7A2	-26	0
COX7A2	-186	-36
COX7A2	-346	-196
COX7A2	-626	-476
COX7B	-500	-350
COX7B	-160	-10
COX7B2	-138	0
COX7C	-443	-293
COX7C	-183	-33
COX8A	-238	-88
COX8A	-73	0
COX8C	-1000	-941
COX8C	-371	-221
COX8C	-191	-41
CYC1	-501	-351
CYC1	-221	-71
NDUFA1	-1000	-963
NDUFA1	-853	-703
NDUFA1	-693	-543
NDUFA1	-413	-263
NDUFA1	-33	0
NDUFA10	-71	0
NDUFA10	-296	-146
NDUFA10	-476	-326
NDUFA10	-631	-481
NDUFA10	-956	-806
NDUFA10	-1000	-966
NDUFA11	-31	0
NDUFA11	-206	-56
NDUFA11	-486	-336
NDUFA11	-666	-516
NDUFA11	-866	-716
NDUFA12	-121	0
NDUFA12	-421	-271
NDUFA13	-978	-828
NDUFA13	-713	-563
NDUFA13	-558	-408
NDUFA13	-318	-168
NDUFA13	-98	0
NDUFA2	-20	0
NDUFA2	-345	-195
NDUFA2	-540	-390
NDUFA2	-705	-555
NDUFA3	-534	-384
NDUFA3	-219	-69
NDUFA4	-97	0
NDUFA4	-517	-227
NDUFA4	-777	-627
NDUFA4	-1000	-912
NDUFA5	-72	0
NDUFA5	-412	-262
NDUFA6	-22	0
NDUFA6	-182	-32
NDUFA6	-442	-292
NDUFA6	-707	-557
NDUFA6	-902	-752
NDUFA7	-130	0
NDUFA7	-450	-300
NDUFA7	-870	-720
NDUFA8	-52	0
NDUFA8	-517	-367
NDUFA9	-903	-753
NDUFA9	-603	-453
NDUFA9	-383	-233
NDUFA9	-103	0
NDUFAB1	-151	-1
NDUFAB1	-416	-266
NDUFAB1	-931	-781
NDUFAB1	-1000	-941
NDUFB1	-217	-67
NDUFB1	-462	-312
NDUFB1	-697	-547
NDUFB1	-862	-712
NDUFB10	-551	-401
NDUFB10	-391	-241
NDUFB10	-76	0
NDUFB11	-1	0
NDUFB11	-341	-191
NDUFB11	-581	-431
NDUFB2	-260	-110
NDUFB2	-80	0
NDUFB3	-841	-691
NDUFB3	-556	-406
NDUFB3	-396	-246
NDUFB3	-141	0
NDUFB4	-327	-177
NDUFB4	-47	0
NDUFB5	-754	-604
NDUFB5	-474	-324
NDUFB5	-154	-4
NDUFB6	-68	0
NDUFB6	-388	-238
NDUFB6	-553	-403
NDUFB7	-161	-11
NDUFB8	-94	0
NDUFB8	-294	-144
NDUFB8	-554	-404
NDUFB9	-1000	-872
NDUFB9	-622	-472
NDUFB9	-382	-232
NDUFB9	-82	0
NDUFC1	-65	0
NDUFC1	-245	-95
NDUFC2	-270	-120
NDUFC2	-765	-615
NDUFC2	-10	0
NDUFS1	-127	0
NDUFS1	-407	-257
NDUFS1	-687	-537
NDUFS1	-907	-757
NDUFS2	-906	-756
NDUFS2	-581	-431
NDUFS2	-141	0
NDUFS3	-956	-806
NDUFS3	-576	-426
NDUFS3	-381	-231
NDUFS3	-81	0
NDUFS4	-499	-349
NDUFS4	-339	-189
NDUFS4	-84	0
NDUFS5	-646	-496
NDUFS5	-346	-196
NDUFS5	-106	0
NDUFS6	-995	-845
NDUFS6	-735	-585
NDUFS6	-515	-365
NDUFS6	-335	-185
NDUFS6	-55	0
NDUFS7	-781	-631
NDUFS7	-506	-356
NDUFS7	-266	-116
NDUFS8	-943	-793
NDUFS8	-443	-293
NDUFS8	-243	-93
NDUFS8	-83	0
NDUFV2	-827	-677
NDUFV2	-387	-237
NDUFV2	-107	0
NDUFV3	-853	-703
NDUFV3	-613	-463
NDUFV3	-413	-263
NDUFV3	-133	0
SDHA	-875	-725
SDHA	-635	-485
SDHA	-415	-265
SDHA	-95	0
SDHB	-85	0
SDHC	-700	-550
SDHC	-480	-330
SDHC	-325	-175
SDHC	-105	0
SDHD	-867	-717
SDHD	-587	-437
SDHD	-402	-252
SDHD	-107	0
UQCR10	-1000	-877
UQCR10	-862	-712
UQCR10	-707	-557
UQCR10	-267	-117
UQCR10	-87	0
UQCR10	-487	-337
UQCR11	-567	-417
UQCR11	-947	-797
UQCR11	-187	-37
UQCRB	-68	0
UQCRB	-253	-103
UQCRB	-413	-263
UQCRC1	-112	0
UQCRC1	-372	-222
UQCRC1	-832	-682
UQCRFS1	-54	0
UQCRFS1	-239	-89
UQCRFS1	-459	-309
UQCRH	-1000	-889
UQCRH	-879	-729
UQCRH	-439	-289
UQCRH	-139	0
UQCRQ	-513	-363
UQCRQ	-218	-68
