# Supplementary material for: Human primitive brain displays negative mitochondrial-nuclear expression correlation of respiratory genes
Source: HighWire-hosted journal article supplement (doi:10.1101/gr.226324.117), 2018-06-14
Supplement: Supplemental_Table_S6.xlsx [file Supplemental_Table_S6.xlsx]

## Sheet: Sheet1
Supplemental Table S6. Coordinates of DNase I footprinting sites upstream to all human OXPHOS genes.
ATP5F1A	ATP5F1B	ATP5F1C	ATP5F1D	ATP5F1E	ATP5PB	ATP5MD1	ATP5MC2	ATP5MC3	ATP5PD	ATP5ME	ATP5PO	ATP5MF	ATP5MG	ATP5MG2	ATP5PO2	ATP5IF1	COX4I1	COX4I2	COX5A	COX5B	COX6A1	COX6A2	COX6B1	COX6B2	COX6C	COX7A2	COX7B	COX7B2	COX7C	COX8A	COX8C	CYC1	NDUFA1	NDUFA10	NDUFA11	NDUFA12	NDUFA13	NDUFA2	NDUFA3	NDUFA4	NDUFA5	NDUFA6	NDUFA7	NDUFA8	NDUFA9	NDUFAB1	NDUFB1	NDUFB10	NDUFB11
CHD1	SIN3AK20	SRF	CEBPβ	MAX	CHD1	NFIC	POLR2A	KDM5B	TCF7L2	POLR2A	POLR2A	CHD1	YY1	SPI1	SMARCB1	CBX3	SIN3AK20	EBF1	MAX	ZNF263	ATF2	STAT3	POLR2A	EZH2	POLR2A	POLR2A	POLR2A	GATA3	SETDB1	SETDB1	SETDB1	E2F1	SIN3AK20	RBBP5	POLR2A	SIN3AK20	BCL3	RBBP5	CHD1	POLR2A	HDAC1	POLR2A	POLR2A	SIN3A	MAX	RBBP5	POLR2A	KAP1	POLR2A
POLR2A	POLR2A	STAT3	RBBP5	CHD1	FOS	GTF3C2	CHD1	E2F1	REST	RBBP5	PHF8	RBBP5	YY1		SMARCC1	CEBPβ	TBP	TCF12	POLR2A	CHD1	POLR2A	FOS	MAX	ZNF143	KAP1	ELF1	CBX3		STAT1	GATA1	CTCF	SAP30	YY1	POLR2A	MAX	POLR2A	ZBTB7A	POLR2A	POLR2A	RBBP5	CHD1	RBBP5	PHF8	POLR2A	TBL1XR1	SMARCB1	RELA	SMARCC1	PHF8
SIN3A	EP300	STAT3	GATA1	POLR2A	EGR1	TCF12	ZNF143	HMGN3	KAP1	KDM5B	ETS1	MYC	CTCF		SIN3A	CEBPδ	POLR2A	EBF1	PHF8	SAP30	PHF8	STAT3	PHF8	EGR1	E2F1	ATF2	GTF2F1		GATA1	MXI1	CTCF	HDAC1	POLR2A	ETS1	PHF8	PHF8	POLR2A	MAX	TCF12	PHF8	POLR2A	SIN3A	RBBP5	RBBP5	STAT3	POLR2A	KDM5B	KAP1	PML
PHF8	STAT5A	RBBP5	POLR2A	MYC	ZBTB7A	POLR2A	CTCF	MXI1	POLR2A	SIN3AK20	TAF1	SP4	RUNX3		RBBP5	RUNX3	SIN3AK20	TCF12	RBBP5	POLR2A	HDAC8	FOS	KAP1	EZH2	ZBTB33	TFAP2C	CTCF		NFIC	E2F1	RAD21	POLR2A	MAX	SIN3A	HDAC1	WRNIP1	CTCF	YY1	FOSL2	CEBPβ	RBBP5	BCLAF1	TAF1	PHF8	FOS	KDM5B	SMARCB1	SMARCC1	TAF1
TAF1	CHD1	RBBP5	PML	PHF8	CHD1	RPC155	POLR2A	TAF1	FOSL2	TFAP2A	MYC	E2F6	EGR1		PHF8	BHLHE40	TBP		E2F1	SPI1	TFAP2A		MAZ	ZNF143	PPARGC1A	MTA3	RAD21		GATA2	SP2	CTCFL	MYC	TAF1	PHF8	GATA1	SIN3A	KAP1	SIN3A	HDAC2	SIN3AK20	HDAC8	YY1	ATF2	HDAC1	MYC	PHF8	TAF1	E2F1	TBP
RBBP5	SIN3A	POLR2A	SIN3AK20	YY1	ZBTB7A	REST	YY1	YY1	TCF12	TAF1	MAX	PHF8	SPI1		SAP30	GTF3C2	POLR2A		GATA1	ZBTB7A	TFAP2C		E2F1	EGR1	POLR2A	SIN3A	SMC3		ELK1	NFIC		SIN3AK20	CEBPβ	CCNT2	SIN3AK20	E2F1	ZBTB7A	TAF1	ELF1	RCOR1	PHF8	SP4	CTCF	CTCF	TBL1XR1	TAF7	PML	CTBP2	E2F1
YY1	RBBP5	ELK4	GATA2	RBBP5	PHF8	TAF1	TBP	KAP1	SAP30	SIN3A	GABPA	HMGN3	YY1		TFAP2A	CEBPβ	ZBTB7A		PML	PHF8	CTCF		E2F6	EZH2		NFIC	TBL1XR1		ELK4	SMARCA4		CTCF	ELF1	MXI1	E2F1	MYBL2	POLR2A	MYC	RCOR1	GTF2F1	E2F1	TAF1	KDM5B	TAF1	MYC	SAP30	E2F4	YY1	SIN3AK20
MYC	PHF8	PHF8	SIN3A	TAF1	SIN3A	PHF8	TAF1	E2F6	PHF8	MYC	MAZ	E2F1	CTCF		TFAP2C	RUNX3	E2F1		UBTF	EGR1	PML		JUND	STAT3		RBBP5	TEAD4		CBX3	MYBL2		SIN3A	TBP	MAX	RELA	REST	CTCF	PML	MYBL2	UBTF	PML	RELA	CCNT2	TBP	E2F6	HDAC1	TCF7L2	NR2F2	MYC
MAX	ATF2	TAF1	ARID3A	BHLHE40	HDAC1	SIN3AK20	YY1	PML	SP4	BCLAF1	CHD1	POLR2A	RUNX3		STAT5A	BHLHE40	CTCF		TAF1	ZNF263	MAX		RBBP5	EZH2		GTF2F1	POLR2A		TCF12	SIN3AK20		MAX	SMARCB1	MYC	YY1	RELA	KAP1	E2F1	JUND	MYC	SAP30	EP300	RELA	RUNX3	TEAD4	E2F1	E2F1	MYC	CHD1
HMGN3	YY1	SMARCB1	JUND	SIN3A	SAP30	RELA	TBP	TCF12	CHD1	MXI1	FOXM1	MTA3	EGR1		POLR2A	GTF3C2	SAP30		TBL1XR1	CHD1	SIN3A		MXI1	STAT3		PHF8	CBX3		GABPA	NFYB		TAF1	YY1	TCF7L2	SP4	NFIC	RBBP5	TBP	REST	REST	TCF7L2	TAF7	EP300	MXI1	E2F4	REST	NFIC	CTCF	CEBPβ
SAP30	RELA	SIN3A	RBBP5	KDM5B	TAF1	GTF2F1	TAF1	BHLHE40	HDAC1	YY1	SMARCB1	HDAC1	SPI1		ZNF263	RELA	MYC		TAF7	SAP30	WRNIP1		NRF1			JUND	GTF2F1		ZBTB33	IRF3		ZBTB7A	POLR2A	MYBL2	RCOR1	KAP1	PHF8	MAZ	MAX	RELA	MYBL2	IRF1	JUND	ELF1	MAX	PML	REST	CCNT2	TCF7L2
HDAC1	CCNT2	GABPA	GATA1	FOXP2	POLR2A	CTCF	HDAC2	GTF2F1	SIN3A	TFAP2C	HMGN3	TAF1	GTF3C2		ATF2	KAP1	ZBTB7A		REST	POLR2A	MXI1		GABPA			KDM5B	CTCF		SIX5	STAT1		MAZ	MAX	BCLAF1	TCF12	ETS1	E2F1	TAF7	PHF8	KDM5A	TRIM28	TBP	YY1	MYC	CHD1	HDAC2	MYBL2	SMC3	GABPA
CCNT2	NFIC	SIN3AK20	POLR2A	SP4	MAZ	TBP		IRF1	PML	REST	EGR1	ZNF263	CHD2		HMGN3	SMARCC1	E2F1		YY1	ZBTB7A	MYC		NFYA			GABPA	RAD21		MYC	NFYA		MXI1	TBP	KDM5A	MAZ	TCF12	CHD1	E2F4	CBX3	TAF1	FOXM1	MAZ	PML	REST	MTA3	TAF1	ETS1	STAT1	SP4
KDM5B	NR2F2	ELF1	PML	PML	SIN3AK20	GATA2		MAX	MYC	TBL1XR1	CCNT2	YY1	CHD1		TBL1XR1	CHD1	CTCF		TBP	PHF8	E2F6		SP2			SAP30	SMC3		TRIM28	SP4		RFX5	SMARCB1	NR2C2	ATF2	TCF7L2	POLR2A	MBD4	E2F1	KAP1	ATF2	MXI1	MXI1	E2F6	KAP1	SIN3A	SMARCC2	ETS1	REST
ELF1	REST	ELK1	SIN3AK20	SIN3AK20	ETS1	ZBTB33		MYBL2	E2F1	ELK1	ELF1	SIN3A	CTCF		CCNT2	PHF8	SAP30		ARID3A	EGR1	SMC3		NFYB			SETDB1	TBL1XR1		SETDB1	MAX		NRF1	ELF1	RCOR1	TBP	PML	CTCF	MXI1	RELA	KDM5B	ETS1	HMGN3	RCOR1	CREB1	MYC	PPARGC1A	NR2C2	TCF7L2	CBX3
BCLAF1	KAP1	SPI1	GATA2	EP300	CTCF	CEBPδ		SIN3AK20	GABPA	GABPA	SIN3AK20	REST	GTF3C2		REST	ZNF263	MYC		ZKSCAN1	MYC	E2F1		CHD2			ZNF263	TEAD4		STAT1	GTF2F1		E2F1	TCF12	YY1	IRF1	YY1	KAP1	TBL1XR1	TAF1	TAF7	YY1	GTF2B	NFYA	MAZ	E2F6	NFIC	FOXA1	MAX	E2F4
CHD2	MYC	IRF1	SIN3A	RELA	CHD1	ETS1		MYC	UBTF	TBP	PAX5	STAT5A	CHD2		MYC	YY1	PHF8		MXI1	CEBPβ	TBP		GTF2B			REST	YY1		GATA1	RFX5		SAP30	SIN3AK20	MAZ	MXI1	TAF1	RBBP5	NFYB	YY1	PML	WRNIP1	KDM5B	KDM5A	GTF2F1	E2F4	MAZ	EP300	PML	TRIM28
REST	UBTF	TBP	ARID3A	TBP	ZBTB7A	GATA3		ATF2	TAF1	NR2C2	NR2C2	ELK1	CHD1		RELA	POLR2A	POLR2A		TCF7L2	MYBL2	MAZ		TBP			PML	JUND		NFIC	CHD2		HDAC1	SMARCB1	ARID3A	CCNT2	MXI1	PHF8	E2F6	CHD1	IRF1	TAF1	MYC	POU2F2	CCNT2	CHD1	YY1	CHD2	MAZ	CTCF
TAF7	MAZ	PAX5	JUND	GABPA	PHF8	BRCA1		TCF7L2	RBBP5	CHD2	CEBPδ	JUNB	POLR2A		TEAD4	TAF1	TAF1		SIN3AK20	NFIC	ZNF263		E2F4			MAZ	MYC		GATA2	SP1		POLR2A	ELF1	SIN3AK20	JUND	TAF7	E2F1	CHD2	POLR2A	SP1	FOS	GTF2F1	RAD21	NFYB	MTA3	GTF2F1	WRNIP1	RAD21	RFX5
TEAD4	PML	RCOR1	MYC	RUNX3	SIN3A	RUNX3		CHD2	IRF4	TAL1	YY1	RELA	PAX5		TAF1	KAP1	CTCFL		NR3C1	MAX	NRF1		SP1			KAP1	ARID3A		ELK1	TBP		MYC	TCF12	TAF1	CBX3	CCNT2	CHD1	MYBL2	TCF12	POU2F2	JUND	MAX	MAX	MAX	KAP1	ELK4	FOXM1	POLR2A	MAZ
SIN3AK20	MAX	E2F4	ELK1	PPARGC1A	HDAC1	CHD2		EP300	ELK4	KDM5A	POLR2A	CCNT2	TCF7L2		IRF4	SMARCC1	HDAC1		ELK1	TBP	RCOR1		SIN3A			CHD2	RCOR1		ELK4	GABPA		SIN3AK20	SIN3AK20	ZEB1	KAP1	HMGN3	BCL3	KAP1	FOSL2	YY1	SIN3A	BHLHE40	TCF3	ZKSCAN1	GTF2F1	ETS1	SP1	KAP1	ZNF143
TBP	TAF1	JUND	MAZ	RCOR1	SAP30	MAZ		MAZ	RELA	IRF1	TAF1	MXI1	PML		MXI1	CHD1	KDM5B		SRF	CEBPδ	NFYB		ATF1			TAF1	IRF1		CBX3	IRF1		CTCF	SMARCB1	EBF1	E2F4	IRF1	SAP30	SMARCA4	ELF1	JUND	RUNX3	NFYA	SMC3	ELK1	POLR2A	ESRRA	TCF12	SMARCC1	SMC3
NR2C2	RCOR1	MAZ	RUNX3	SPI1	TAF1	EP300		NRF1	POU2F2	ZKSCAN1	SIN3AK20	SIN3AK20	PHF8		KDM5B	PHF8	SIN3A		FOXP2	E2F1	NFYA		FOS			SIN3AK20	RFX5		TCF12	PBX3		SIN3A	TCF12	TFAP2A	SIN3A	KDM5B	MYBL2	RFX5	RCOR1	TCF3	SP4	CHD2	SPI1	E2F4	MYBL2	POU2F2	STAT1	E2F1	IRF1
PML	TEAD4	RBBP5	BCLAF1	MAZ	POLR2A	TCF7L2		GABPA	MXI1	TCF7L2	TBP	PML	KDM5B		NR2F2	ZNF263	E2F1		CHD2	POLR2A	RELA		ELK4			MXI1	JUN		GABPA	TCF7L2		MAX	SIN3AK20	TCF12	ELK1	FOXM1	NFIC	NR2C2	MYBL2	TCF12	POU2F2	TCF7L2	TBL1XR1	CHD2	STAT1	MAX	MAFF	CTBP2	SP1
POU2F2	KDM5B	POLR2A	TBL1XR1	CCNT2	MAZ	CEBPβ		PPARGC1A	EBF1	EP300	ZBTB7A	KDM5B	E2F1		GTF2F1	YY1	PHF8		MYC	PHF8	THAP1		PBX3			TCF7L2	E2F4		ZBTB33	E2F4		TAF1	POLR2A	GTF2F1	SP1	RBBP5	TCF7L2	BCL3	JUND	GATA3	GTF2F1	SP1	GTF2F1	MAFK	RBBP5	GATA1	ELF1	YY1	CCNT2
MAZ	CBX3	ELK4	RCOR1	HMGN3	SIN3AK20	FOXP2		E2F4	TBP	E2F1	EGR1	GTF2F1	FOS		TRIM28	POLR2A	POLR2A		NFYB	MYC	GTF2F1		RFX5			ELK4	ZBTB33		SIX5	FOXM1		MAZ	CHD2	EP300	ZKSCAN1	MYC	GABPA	NFYA	REST	TBP	SIX5	RFX5	FOXP2	E2F1	TCF12	FOXM1	BRCA1	NR2F2	PBX3
TCF7L2	MXI1	PHF8	CBX3	ELK1	ETS1	MYBL2		JUND	TEAD4	RCOR1	CHD2	STAT1	REST		YY1	TAF1	TAF1		MAZ	CEBPβ	STAT1		POLR2A			RCOR1	MXI1		MYC	MAZ		MXI1	RBBP5	CHD2	MYBL2	TBP	E2F6	FOXM1	PHF8	CEBPδ	MYC	NFYB	NR3C1	SMC3	STAT3	MXI1	TBP	MYC	CHD2
GTF2B	ESRRA	TAF1	MAX	CHD2	CTCF	E2F4		TBP	IRF1	MAZ	BRCA1	JUND	MYBL2		PML	REST	HDAC1		ZBTB33	MYBL2	EP300		MAX			YY1	ATF2		TRIM28	ELK4		RFX5	PHF8	GABPA	EP300	ZBTB7A	ETS1	TCF12	E2F1	EP300	TAF7	MYBL2	ELF1	SP1	REST	RELA	EGR1	CTCF	FOS
JUND	GTF2F1	SMARCB1	TAL1	ARID3A	RBBP5	BHLHE40		TRIM28	RUNX3	ELF1	WRNIP1	IRF1	MXI1		ESRRA	TBP	KDM5B		RXRA	NFIC	ELK4		PHF8			TAF7	SP1		E2F1	SIX5		NRF1	WRNIP1	TFAP2C	ARID3A	POU2F2	PML	SP1	RELA	MYBL2	REST	E2F6	PAX5	CEBPβ	ETS1	MYBL2	SIX5	CCNT2	NFYB
NFATC1	CTCF	SIN3A	EP300	RFX5	UBTF	FOSL2		SP1	ZNF263	MAX	TAF1	MAZ	SIN3AK20		TAF7	ARID3A	SIN3A		THAP1	MAX	CHD2		KAP1			MYC	SIX5		E2F4	MYC		SREBP1	E2F4	IRF1	MYC	MAZ	ELF1	GABPA	TAF1	SMARCC2	TEAD4	E2F4	TBP	NRF1	ZBTB33	HMGN3	CHD1	SMC3	SP2
GABPA	CEBPδ	GABPA	IRF1	ELF1	REST	ELF1		ZKSCAN1	MYBL2	FOXP2	POLR2A	HNF4A	TAF1		IRF1	NFYB	REST		SP1	TBP	RFX5		MAZ			MAX	ATF1		ETS1	FOS		TCF7L2	SAP30	ESRRA	SAP30	ELK4	TCF12	USF2	YY1	NFIC	TBP	KAP1	GRp20	ATF3	MAZ	TBP	GTF2F1	STAT1	ELF1
CEBPδ	FOXP2	SIN3AK20	CHD2	IRF3	RELA	ZNF143		ETS1	BACH1	ZBTB33	BRCA1	ETS1	RELA		GTF2B	CHD2	ETS1		IRF1	CEBPδ	ELF1		E2F1			TRIM28	KDM5B		IRF1	TRIM28		TBL1XR1	HDAC1	ATF3	PAX5	CHD2	HMGN3	ARID3A	TBP	STAT2	TBL1XR1	FOS	CHD2	FOXP2	SIN3AK20	TCF12	YY1	ETS1	CREB1
EGR1	TAL1	ELF1	TBP	PAX5	TCF7L2	ATF3		ESRRA	MAX	WRNIP1	WRNIP1	SP2	TBP		BHLHE40	GTF2F1	MAX		FOSL1	E2F1	STAT3		E2F6			ELK1	ELF1		ELF1	JUND		IRF1	E2F1	TBL1XR1	MEF2C	MAX	MYC	USF1	POU2F2	MAFF	STAT1	SP2	SIN3AK20	SREBP1	SIX5	CCNT2	MAZ	TCF7L2	GTF2F1
MXI1	E2F6	ELK1	EGR1	PBX3	TBP	USF2		RFX5	NR2C2	SIX5	TAF1	EP300	GTF2B		ETS1	NFYA	RBBP5		ETS1	GTF2F1	GABPA		JUND			ETS1	CHD2		POLR2A	NFATC1		SP1	SIN3A	E2F4	FOS	EP300	JUND	FOS	PML	GATA1	SIN3AK20	USF2	ATF3	IRF1	CHD1	KDM5A	BHLHE40	MAX	YY1
USF1	MAFK	SPI1	HMGN3	SREBP1	MAX	MYC		TBL1XR1	ELK1	JUND	GATA1	POU2F2	E2F6		POU2F2	E2F4	SIX5		BACH1	PML	ELK1		RBBP5			STAT3	ZNF143		CHD2	E2F6		FOXP2	TCF7L2	RFX5	BHLHE40	SIX5	E2F4	MTA3	SPI1	ELK4	EP300	CREB1	GABPA	SIN3AK20	MTA3	MYC	JUND	PML	ZKSCAN1
USF2	TAF7	IRF1	MXI1	SP1		SIX5		ELF1	RFX5	RFX5	SIRT6	KDM5A	POLR2A		CHD2	RFX5	ELK4		JUND	ARID3A	IRF1		MXI1			GATA2	EBF1		EP300	TFAP2A		CREB1	PML	BHLHE40	NRF1	GTF2F1	HDAC1	SP2	ZBTB33	GATA2	E2F4	TRIM28	RFX5	NFYA	KAP1	CHD2	RBBP5	MAZ	NFYA
POLR2A	RUNX3	TBP	CCNT2	STAT1		YY1		MEF2A	SPI1	CCNT2	UBTF	HNF4G	PAX5		TBP	IRF1	ZNF263		EP300	GTF2B	SIN3AK20		NRF1			IRF1	ETS1		TBP	SIN3A		USF1	MAX	GRp20	E2F6	CBX3	SIN3AK20	ETS1	MAZ	SMARCC1	JUNB	STAT1	SIX5	FOXA1	GTF2F1	ZKSCAN1	USF1	RAD21	MXI1
PHF8	STAT1	PAX5	SIX5	NFYA		USF1		POU2F2	CHD2	ZEB1	TCF7L2	SETDB1	TCF7L2		TCF12	RBBP5	SIN3AK20		E2F4	ATF1	JUND		GABPA			TEAD4	BRCA1		RELA	POLR2A		E2F6	UBTF	SP1	CEBPβ	RCOR1	SIX5	CCNT2	PAX5	ETS1	MAX	E2F1	MYC	SIN3A	POLR2A	GRp20	CCNT2	SIN3A	TAF7
TAF1	RFX5	RCOR1	RELA	EGR1		UBTF		ELK1	EP300	BHLHE40	TBP	RUNX3	PML		TAL1	SP2	MYC		RELA	NR3C1	RBBP5		NFYA			NFATC1	TBP		GTF2F1	TFAP2C		ETS1	E2F6	BRCA1	WRNIP1	ELF1	ELK4	CBX3	IRF1	MBD4	MAFK	GATA1	IRF1	E2F1	MYBL2	JUND	CREB1	ZKSCAN1	POLR2A
RBBP5	PAX5	E2F4	YY1	FOS		EGR1		RCOR1	ELF1	CTCF	RCOR1	TBP	PHF8		BACH1	SP1	MXI1		EGR1	KDM5B	TAF1		SP2			TCF12	MAFF		ZNF143	EGR1		PBX3	TEAD4	HDAC2	TBL1XR1	PPARGC1A	YY1	IRF1	RBBP5	RUNX3	KDM5A	CHD1	REST	SIN3AK20	STAT1	SIX5	FOXP2	E2F4	PHF8
MYC	POU2F2	JUND	USF2	IRF1		STAT3		NR2C2	MAZ	FOS	BHLHE40	MAX	KDM5B		HDAC2	FOS	SMARCB1		CCNT2	MAZ	SP1		NFYB			UBTF	CEBPβ		JUN	FOXA1		CHD2	HMGN3	HNF4A	TFAP2C	BHLHE40	REST	PAX5	NRF1	SP4	FOXP2	TBL1XR1	ZBTB33		RBBP5	ELK1	SIN3A	CHD2	PML
MAX	IRF1	MAZ	ETS1	NFYB		CREB1		HNF4A	NFYB	SMC3	HDAC2	TCF3	E2F1		MAX	GABPA	TBP		CREB1	NRF1	E2F4		CHD2			NR2C2	SIN3AK20		TBL1XR1	BRCA1		RELA	ETS1	PAX5	POLR2A	USF1	GTF2F1	SETDB1	TCF7L2	MAX	RCOR1	NRF1	E2F6		TCF12	ZBTB33	SIN3AK20	JUND	TAF1
KDM5B	JUND	EGR1	ELF1	BCL3		NFIC		TAF7	ARID3A	SP1	GATA2	NFIC	FOS		E2F6	IRF3	SP4		ELF1	TAF1	ZNF143		GTF2B			EP300	PML		MAFF	ATF1		BACH1	SIN3AK20	RUNX3	MAX	CEBPδ	RELA	GATA1	SIN3A	GTF2B	MAZ	PBX3	SP1		STAT3	IRF1	PAX5	SMARCB1	TBP
CHD2	GTF2B	FOXP2	BHLHE40	E2F6		MAX		FOXP2	IRF3	NRF1	TAL1	TBL1XR1	REST		ELF1	MAZ	NR2F2		E2F6	NFYB	EGR1		TBP			CEBPβ	GTF2B		TAF1	JUN		BRCA1	POLR2A	SP4	PHF8	RAD21	TAF1	BCLAF1	ETS1	E2F1	BRCA1	CTCF	RDBP		REST	ATF3	PHF8	EGR1	E2F1
TEAD4	ELF1	MXI1	CREB1	MEF2A		GABPA		SIX5	USF2	PAX5	CEBPβ	JUN	MYBL2		RFX5	MAX	ELF1		BRCA1	RUNX3	NR2C2		E2F4			RELA	TAF1		BHLHE40	ELK1		YY1	CHD2	ATF1	HDAC1	GABPA	MAX	ELF1	CHD2	JUN	CHD2	RCOR1	MAZ		ETS1	SETDB1	UBTF	CTCFL	MYC
SIN3AK20	TBP	WRNIP1	ZNF143	HDAC1		E2F1		CREB1	HMGN3	IRF4	WRNIP1	BCLAF1	MXI1		ESR1	EGR1	RELA		RFX5	JUND	RUNX3		SP1			STAT2	CHD1		STAT3	KDM5B		ZNF143	RBBP5	JUND	SIN3AK20	RFX5	CHD2	JUND	SIX5	ZBTB33	EBF1	NR2F2	CREB1		ZBTB33	MEF2A	TCF3	HMGN3	CHD1
TBP	TCF3	TBL1XR1	GTF2F1	MYBL2		FOS		HDAC2	NFYA	E2F4	TAF1	HDAC6	SIN3AK20		RCOR1	PML	CCNT2		RCOR1	E2F6	YY1		SIN3A			TBL1XR1	RELA		SP1	GTF2B		TBP	PHF8	SIX5	E2F1	SP1	MXI1	CREB1	ESR1	TCF7L2	MXI1	ELK1	SRF		MAZ	HNF4A	MAFK	NR3C1	SP4
NR2C2	BHLHE40	CREB1	USF1	TFAP2C		NRF1		CCNT2	USF1	USF1	GATA1	RFX5	TAF1		E2F4	UBTF	TCF7L2		CEBPβ	SP1	HDAC1		ATF1			GTF2B	TAF7		ESR1	STAT3		E2F4	WRNIP1	FOXP2	YY1	ZKSCAN1	IRF1	EP300	MYC	MAZ	CREB1	CCNT2	BRCA1		SIN3AK20	BHLHE40	POU2F2	FOXP2	MAZ
MAZ	ZBTB33	CHD2	BRCA1	ZNF143		HSF1		BCLAF1	CCNT2	JUNB	SIRT6	GTF2B	RELA		CEBPβ	SMARCB1	ATF3		SREBP1	EGR1	REST		FOS			TBP	TAL1		STAT2	RBBP5		ZBTB33	E2F4	CREB1	SP4	E2F6	TBP	RUNX3	MXI1	TEAD4	NR2C2	BRCA1	USF1		SIX5	CBX3	CTCF	RELA	CCNT2
TCF7L2	TCF12	ZBTB33	TCF7L2	MXI1		RCOR1		FOXA1	ATF1	JUN	UBTF	CEBPδ	TBP		FOXP2	JUND	MAZ		JUN	CHD2	SRF		ELK4			BCLAF1	REST		JUND	ZNF143		PHF8	SAP30	KDM5B	TCF12	FOXP2	POU2F2	TEAD4	ELK1	TFAP2C	BHLHE40	ETS1	MAFF		TAF1	E2F4	SAP30	MXI1	GTF2F1
GTF2B	FOSL2	SP2	TAF1	TFAP2A		JUND		ZBTB33	FOXP2	GTF2F1	TCF7L2	CBX3	GTF2B		JUND	SIN3A	YY1		ZNF143	ELK4	SPI1		PBX3			ARID3A	PHF8		PML	EP300		TAF7	HDAC1	ZNF143	ATF2	BACH1	NR2C2	ELK4	ZNF143	ATF3	ZNF143	EGR1	JUN		PML	GABPA	HMGN3	ELF1	YY1
NFATC1	SRF	BRCA1	REST	CREB1		TCF12		NR2F2	ZNF143	RAD21	TBP	TCF12	E2F6		SP1	RCOR1	NR2C2		BHLHE40	SIN3A	PHF8		RFX5			ATF1			RUNX3	SRF		POU2F2	E2F1	MEF2A	IRF1	PAX5	PPARGC1A	SIN3AK20	CREB1	SMARCB1	ARID3A	UBTF	RUNX3		HDAC2	E2F6	TAL1	IRF1	ZKSCAN1
GABPA	FOXM1	REST	TEAD4	SP2		POLR2A		EGR1	STAT1	ZNF143	RCOR1	CHD2	WRNIP1		CREB1	SIN3AK20	ELK1		FOXA1	YY1	SAP30		ELK1			CBX3			BCLAF1	CREB1			SIN3A	TBP	MXI1	NR3C1	ELK1	ESR1	GABPA	CREB1	RFX5	BCL3	TCF12		ELF1	ELF1	TAF7	RUNX3	MXI1
EGR1	SREBP1	CEBPβ	SP1	HDAC2		REST		PAX5	FOS	BRCA1	BHLHE40	E2F4	NFIC		THAP1	TCF7L2	GABPA		USF2	ELF1			TAF1			HDAC2			KDM5B	FOXP2			TCF7L2	USF1	CCNT2	HDAC2	GTF2B	SPI1	FOXP2	TFAP2A	SREBP1	ZBTB7A	ETS1		CHD2	TCF7L2	MYC	TBL1XR1	TAF7
MXI1	CHD2	MAFF	FOXP2	EZH2		TAF1		STAT1	SP1	CREB1	HDAC2	SP1	NRF1		EGR1	ATF1	IRF1		TCF3	GABPA			RELA			CREB1			SIN3AK20	CEBPδ			PML	MAFK	JUND	CEBPβ	RCOR1	RCOR1	E2F4	POLR2A	ATF3	ATF3	BHLHE40		TBP	HNF4G	ZNF263	ZBTB7A	EGR1
USF1	GATA1	CTCF	ATF1	HNF4A		SIN3AK20		ZNF143	CREB1	NR3C1	GATA2	TEAD4	TCF12		ZNF143	TAF7	E2F4		USF1	IRF1			BCLAF1			ZBTB33			SPI1	CEBPβ			MAX	ELF1	CBX3	MEF2C	CEBPβ	STAT3	MAX	RBBP5	FOSL2	ZNF143	EGR1		MAX	EP300	USF2	SP1	POLR2A
USF2	NFYA	ETS1	NRF1	HNF4G		RELA		RXRA	E2F4	ATF2	TAL1	TAF7	MAX		USF1	RELA	EP300		ZNF263	SPI1			PML			STAT5A			USF1	TAF1			UBTF	POU2F2	KAP1	MEF2A	MAZ	ATF2	SIN3AK20	PHF8	IRF1	STAT5A	SMARCA4		MYC	PAX5	POLR2A	PHF8	CHD1
ATF3	NFYB	PML	ATF3	ZBTB7A		GTF2F1		FOSL2	SP2	ATF3	CEBPβ	TCF7L2	CREB1		NRF1	FOXP2	CHD2		ATF3	FOXM1			ETS1			RFX5			FOS	ETS1			E2F6	RXRA	E2F4	JUND	KDM5A	ATF1	ATF3	CEBPβ	JUN	TCF12	USF2		BRCA1	BCLAF1	RELA	ZNF143
RUNX3	CREB1	ATF2	E2F4	CEBPδ		TBP		SPI1	EGR1	USF2	TEAD4	FOXP2	MYC		RUNX3	ELF1	PML		PBX3	CBX3			IRF1			ATF3			TCF7L2	ELF1			TEAD4	SRF	SIN3A	CREB1	EGR1	ZNF143	BHLHE40	MYC	SP1	SMC3	ZNF143		NFIC	FOXP2	KDM5B	SIX5
BRF2	SP1	MYC	CEBPβ	PHF8		GATA2		MEF2C	RXRA	CEBPδ	MEF2A	TAL1	ELK4		JUN	CREB1	STAT5A		PAX5	REST			CEBPβ			NR2F2			CREB1	RELA			HMGN3	EGR1	SP1	STAT1	PAX5	FOXP2	SRF	REST	ATF1	PAX5	TAF7		NRF1	RXRA	SMARCB1	PAX5
CTCF	SP2	RELA	SRF	POU2F2		ZBTB33		NR3C1	ZBTB7A	FOSL2		TRIM28	ELF1		ATF3	E2F6	TBL1XR1		TCF12	STAT1			POU2F2			E2F4			ATF3	TBL1XR1			ETS1	TAF7	MYBL2	EBF1	SP1	SIX5	HMGN3	RELA	FOSL1	ELF1	ATF1		MXI1	SIN3AK20	TAF1	EP300
E2F6	FOS	HDAC1	PAX5	RXRA		CEBPδ		HNF4G	BCLAF1	EGR1		GABPA	SP4		SIX5	PBX3	ZNF143		GTF3C2	TFAP2C			MYC			SP2			ATF1	REST			GTF2F1	REST	EP300	EGR1	BHLHE40	GATA3	RXRA	KAP1	USF1	REST	GTF2B		BHLHE40	CEBPδ	PML	TBP
TAF7	PBX3	YY1	GABPA	BHLHE40		ETS1		JUN	SIN3AK20	PML		FOSL2	TEAD4		ATF1	RUNX3	JUND			TFAP2A			REST			SP1			POU2F2	YY1			MYC	ZNF263	MYC	RUNX3	GRp20	TAL1	NR2C2	PML	SRF	FOXP2	CEBPδ		RELA	NR2C2	TCF7L2	GABPA
GATA2	IRF3	MAX	ESR1	TCF12		GATA3		TCF3	CTCF	ATF1		STAT2	GABPA			CCNT2	USF1			UBTF			ELF1			WRNIP1			YY1	ATF3			TAF1	NR3C1	SAP30	BCL3	RUNX3	SAP30	KDM5A	IRF1	ELK1	JUND	POLR2A		EP300	TBL1XR1	REST	ATF3
POLR2A	ZNF143	POU2F2	E2F6	TCF3		BRCA1		ATF3	STAT3	RELA		ELF1	FOXM1			POU2F2	FOXP2			MXI1			THAP1			SIX5			SIN3A	BCLAF1			MXI1	RELA	FOS	CTCF	FOXP2	PHF8	RUNX3	SP1	RELA	RAD21	PHF8		BCLAF1	ARID3A	MYBL2	NRF1
PHF8	ARID3A	NRF1	SAP30	STAT3		CHD2		CEBPβ	NR3C1	SRF		SRF	SIX5			MYC	TAF7			ELK1			CREB1			EGR1			FOXM1	TEAD4			YY1	ZBTB7A	E2F6	FOSL2	POLR2A	GATA2	PHF8	TCF12	CTCF	GABPA	TAF1		SIN3A	IRF4	EP300	TAF1
MYC	EBF1	RUNX3	E2F1	EBF1		MAZ		WRNIP1	CEBPδ	CEBPβ		ZNF143	E2F4			ETS1	POU2F2			E2F4			YY1			BHLHE40			MAX	SPI1			CCNT2	CEBPδ	CEBPβ	SMC3	KAP1	TCF7L2		TBP	NRF1	POLR2A	ATF2		YY1	RCOR1	WRNIP1	E2F6
MAX	TRIM28	EP300	ZNF263	E2F1		EP300		RUNX3	JUND	CTCFL		EGR1	ETS1			TCF3	HDAC2			HMGN3			SIN3AK20			ZNF143			NRF1	NRF1			TCF3	BACH1	WRNIP1	ZBTB33	RBBP5	KDM5B		MYBL2	TCF3	RBBP5	RELA		CEBPβ	WRNIP1	FOXM1	SIN3AK20
NFATC1	PPARGC1A	KDM5B	PHF8	CTCF		TCF7L2		CBX3	BHLHE40	RUNX3		CREB1	TBL1XR1			HMGN3	E2F6			SP2			IRF4			PAX5			TEAD4	PML			CBX3	PML	TBL1XR1	SRF	PHF8	POU2F2		SMARCC2	STAT2	SIN3A	POU2F2		TAF7	STAT5A	TCF12	ZBTB33
GABPA	GABPA		EBF1	MAX		CEBPβ		CTCF	BRCA1	E2F6		USF1	JUN			HDAC1	EGR1			ETS1			RUNX3			E2F6			GATA3	TAF7			ELK4	IRF4	TFAP2C	PBX3	E2F1	RBBP5		NFIC	ELF1	YY1	GTF2F1		E2F4	CHD1	MAFF	POU2F2
MXI1	SIX5			POLR2A		FOXP2		SRF	FOXA1	ZBTB7A		MEF2A	EP300			PAX5	CREB1			STAT3			IRF3			RXRA			ATF2	CCNT2			REST	CHD1	TFAP2A	NRF1	CHD1	POLR2A		GATA1	POLR2A	SP4	SIN3AK20		RCOR1	NRF1	TBP	TAF7
USF1	BRCA1			MYC		MYBL2		BATF	YY1	PHF8		RAD21	ELK1			KDM5B				MAX			PAX5			EZH2			REST	RUNX3			KDM5B	RBBP5	POU2F2	BCLAF1	BCL3	MAX		ELK4	E2F1	TAF1	MYC		USF2	SP2	GTF2F1	REST
CTCF	WRNIP1			TAF1		E2F4		POLR2A	MEF2C	POLR2A		BHLHE40				CTCF				SIN3AK20			ZBTB33			MYBL2			MAZ	SAP30			FOXP2	POLR2A	HDAC2	POLR2A	SAP30	YY1		GATA2	PML	RELA	RDBP		JUND	USF1	YY1	SRF
TAF7	FAM48A			SIN3A		BHLHE40		PHF8	SIX5	RBBP5		RCOR1				MXI1				RELA			ATF3			FOXP2			MXI1	PAX5			GTF2B	ETS1	EGR1	E2F1	MYBL2	SIN3A		SMARCC1	TAF1	EP300	MAZ		ZEB1	CTCF	MAZ	THAP1
GATA2	ATF1			KDM5B		FOSL2		RBBP5	PAX5	KDM5B		MAFK				SAP30				TAF7			SPI1			MAFK			IRF4	PHF8			RELA	SIN3A	FOXP2	RELA	NFIC	TAF1		ETS1	SP4	IRF1	SMARCA4		ZNF143	SRF	RBBP5	RBBP5
	CTCF			PML		ELF1		REST	PBX3	SIN3AK20		SIX5				TAL1				PML			PHF8			USF2			PHF8	POU2F2			TRIM28	PHF8	FOXA1	KAP1	TCF7L2	MYC		MBD4	GTF2F1	TBP	CHD1		USF1	TRIM28	CCNT2	KDM5B
	MYBL2			SIN3AK20		ZNF143		MXI1	TCF12	TFAP2A		PAX5				EP300				PHF8						USF1			TAF7	SETDB1			TBP	CCNT2	FOXA2	ETS1	GABPA	PML		RUNX3	TBP	MAZ	POLR2A		IRF1	ATF1	SIN3A	POLR2A
	USF1			RCOR1		ATF3			REST	TAF1		CTCF								HDAC2						POLR2A			CTCF	GATA1			MAZ	MXI1	RUNX3	TCF12	E2F6	E2F1		SP4	IRF1	MXI1	CHD1		IRF4	THAP1	SIN3AK20
	FOXA1			MAZ		USF2			CHD1	SIN3A		ZBTB7A								FOXP2						ELF1			RBBP5	MXI1			IRF1	MAX	POLR2A	TCF7L2	ETS1	TBP		MAX	ELK1	HMGN3			TBL1XR1	RFX5	PHF8
	FOSL2			CCNT2		MYC			RBBP5	MYC		ATF3								CEBPδ						ATF2				E2F1			NFYB	MYC	MAX	FOXM1	PML	MBD4		E2F1	RELA	GTF2B			PAX5	CREB1	UBTF
	NRF1			HMGN3		SIX5			SIN3AK20	BCLAF1		POLR2A								CCNT2						TFAP2C				SP2			ELF1	MYBL2	HDAC1	SIX5	ELF1	MXI1		ZBTB33	STAT2	KDM5B			RUNX3	ZNF143	TCF3
	SPI1			STAT1		YY1			HDAC1	MXI1		USF1														MTA3				NFIC			ZBTB33	BCLAF1	SIN3AK20	GTF2F1	TCF12	MYBL2		TCF7L2	ELF1	MYC			CREB1	SP1	MAFK
	POLR2A			E2F6		USF1			ZBTB7A	TFAP2C		USF2														SIN3A				SMARCA4			GABPA	YY1	SP4	CBX3	HMGN3	KAP1		MAZ		GTF2F1			KDM5A	FOXA1	POU2F2
	SIN3A			HDAC1		UBTF			CHD1	REST																NFIC				MYBL2			ELK1	MAZ	MXI1	E2F6	MYC	SMARCA4		TEAD4		MAX			TCF3	EGR1	CTCF
	RBBP5			MYBL2		EGR1			HDAC1	TBL1XR1																RBBP5				SIN3AK20			CREB1	ARID3A	SIN3A	STAT1	JUND	BCL3		TFAP2C		BHLHE40			PBX3	SMC3	SAP30
	RELA			TFAP2C		STAT3			WRNIP1	ELK1																GTF2F1				NFYB			BHLHE40	SIN3AK20	MYC		E2F4	FOXM1		ATF3		NFYA			EGR1	RAD21	HMGN3
	KAP1			MXI1		CREB1			CHD1	GABPA																PHF8				IRF3			ESRRA	TAF1	SAP30		HDAC1	TCF12		SMARCB1		CHD2			POU2F2	TEAD4	TAL1
	MYC			TFAP2A		NFIC			WRNIP1	TBP																JUND				STAT1			EGR1	TFAP2A	TBL1XR1		SIN3AK20	GABPA		CREB1		TCF7L2			PHF8	RUNX3	TAF7
	MAX			HDAC2		MAX				NR2C2																KDM5B				NFYA			JUND	TCF12	TFAP2C		SIX5	USF1		TFAP2A		SP1			KDM5B	CEBPβ	MYC
	RCOR1			EZH2		GABPA				CHD2																GABPA				SP4			ZNF143	GTF2F1	TFAP2A		ELK4	MTA3		MXI1		RFX5				CTCFL	ZNF263
	CBX3			PHF8		E2F1				IRF1																SAP30				MAX			EBF1	EP300	POU2F2		YY1	ETS1		BHLHE40		NFYB				RBBP5	USF2
	MXI1			POU2F2		FOS				ZKSCAN1																SETDB1				GTF2F1			SIX5	CHD2	HDAC2		REST	CCNT2		EGR1		MYBL2				POLR2A	CHD1
	GTF2F1			RXRA		NRF1				TCF7L2																ZNF263				RFX5			POU2F2	TFAP2C	EGR1		GTF2F1	CBX3		E2F4		E2F6				E2F1	USF1
	MAFK			BHLHE40		HSF1				EP300																REST				CHD2			RUNX3	IRF1	FOXP2		RELA	SETDB1		USF1		E2F4				SIN3A	POLR2A
	STAT1			TCF3		RCOR1				E2F1																PML				SP1				ESRRA	FOXA1		TAF1	GATA1		HMGN3		KAP1				NFIC	SMARCB1
	RFX5			E2F1		JUND				RCOR1																MAZ				TBP				TBL1XR1	FOXA2		MAX	BCLAF1		FOXM1		FOS				MAZ	TAF1
	IRF1			CTCF		ELK1				MAZ																KAP1				GABPA				E2F4	TBP		CHD2	JUND		ZBTB7A		SP2				ETS1	TCF7L2
	JUND			WRNIP1		E2F6				MAX																CHD2				IRF1				RFX5	SRF		MXI1	RUNX3		UBTF		USF2				GATA1	RBBP5
	ELF1			SMC3		NFYB				FOXP2																TAF1				TCF7L2				GRp20	NFYA		IRF1	TEAD4		CTCF		CREB1				FOXM1	PHF8
	TBP					NFYA				ZBTB33																SIN3AK20				E2F4				SP1	CHD2		TBP	ELK4		TAF1		TRIM28				MXI1	UBTF
	TCF12					SP2				WRNIP1																MXI1				FOXM1				BRCA1	TCF7L2		POU2F2	SIN3AK20		HDAC1		STAT1				MYBL2	SAP30
	FOXM1					SP1				JUND																TCF7L2				MAZ				HDAC2	NFYB		NR2C2	ATF2		CHD2		E2F1				HMGN3	HMGN3
	CHD2					SPI1				RFX5																ELK4				ELK4				PAX5	SP1		PPARGC1A	FOXP2		BCLAF1		GATA1				TBP	ZNF263
	GATA1					IRF1				CCNT2																RCOR1				SIX5				RUNX3	RFX5		ELK1	GATA3		FOXP2		CHD1				TCF12	CHD1
	NFYA					MAFK				BHLHE40																YY1				MYC				SP4	USF1		GTF2B	TAL1		HDAC2		TBL1XR1				SIX5	MAX
	NFYB					ZKSCAN1				CTCF																MYC				FOS				JUND	MAZ		RCOR1	SAP30		PAX5		NRF1				ZBTB33	POLR2A
	SP1					SAP30				FOS																MAX				TRIM28				FOXP2	PBX3		CEBPβ	PHF8		SIN3AK20		PBX3				ATF3	TAF1
	SP2					RFX5				SMC3																TRIM28				JUND				KDM5B	FOS		MAZ	GATA2		JUND		CTCF				SETDB1	TCF7L2
	FOS					SMARCB1				SP1																ELK1				NFATC1				ZNF143	NRF1		KDM5A	TCF7L2		TAF7		RCOR1				CBX3	CHD1
	PBX3					ATF1				NRF1																ETS1				E2F6				MEF2A	IRF3		EGR1	POU2F2		FOS		NR2F2				E2F6	MAX
	IRF3					MXI1				PAX5																GATA2				TFAP2A				TBP	PAX5		PAX5	STAT1		TBL1XR1		ELK1				ELF1
	ZNF143					IRF3				IRF4																IRF1				SIN3A				ELF1	MXI1		SP1	HDAC1		CBX3		CCNT2				BCLAF1
	ARID3A					JUN				E2F4																TEAD4				POLR2A				POU2F2	ELF1		BHLHE40	KDM5A		YY1		BRCA1				SIN3AK20
	EBF1					RELA				USF1																NFATC1				TFAP2C				RXRA	POLR2A		GRp20	FOSL1		MEF2A		ETS1				TBL1XR1
	TRIM28					GTF2F1				JUNB																UBTF				EGR1				TAF7	SP4		RUNX3	ZNF263		NRF1		UBTF				WRNIP1
	PPARGC1A					WRNIP1				JUN																NR2C2				FOXA1				REST	TFAP2C		FOXP2	ELF1		RAD21		BCL3				CHD1
	GABPA					SIN3A				GTF2F1																EP300				BRCA1				ZNF263	TFAP2A		EP300	RBBP5		EP300		ZBTB7A				SP2
	SIX5					TBP				RAD21																CEBPβ				ATF1				RELA	TBP		RFX5	POLR2A		E2F6		ATF3				CTCF
	BRCA1					POLR2A				ZNF143																RELA				JUN				ZBTB7A	NFYA		SRF	YY1		POU2F2		ZNF143				TRIM28
	WRNIP1					SIN3AK20				BRCA1																STAT2				ELK1				CEBPδ	CHD2		TEAD4	SIN3A		ZNF143		STAT5A				CEBPβ
	FAM48A					ETS1				CREB1																TBL1XR1				KDM5B				BACH1	TCF7L2		CREB1	TCF12		MEF2C		TCF12				POLR2A
	ATF1					BRCA1				NR3C1																GTF2B				GTF2B				PML	NFYB		SPI1	USF1		EBF1		SMC3				SIN3A
	CTCF					CHD2				ATF2																TBP				STAT3				IRF4	SP1		ZNF143	MTA3		GABPA		PAX5				UBTF
	MYBL2					MAZ				ATF3																BCLAF1				RBBP5				CHD1	RFX5		FOSL2	CCNT2		USF2		ELF1				SIN3AK20
	USF1					EP300				USF2																ARID3A				ZNF143				NFIC	USF1		ZBTB33	GATA1		RCOR1		REST				TAF1
	FOXA1					MYBL2				CEBPδ																CBX3				EP300				E2F1	MAZ		JUN	SIN3AK20		CEBPδ		FOXP2				EGR1
	FOSL2					E2F4				FOSL2																CREB1				SRF				RBBP5	PBX3		ATF1	ATF2		TCF3		JUND				CTCF
	NRF1					FOSL2				EGR1																ZBTB33				CREB1				POLR2A	FOS		CCNT2	SAP30		NR2F2		RAD21				CBX3
	SPI1					ELF1				PML																STAT5A				FOXP2				PHF8	NRF1		SIN3A	PHF8		CCNT2		GABPA				NR2F2
	YY1					MYC				ATF1																RFX5				CEBPδ				MYC	IRF3		CTCF	TCF7L2		SRF		RXRA				ZBTB7A
	PML					YY1				RELA																NR2F2				CEBPβ				MYBL2	PAX5		STAT1	STAT1		STAT5A		CTCFL				MAX
	PHF8					UBTF				SRF																E2F4				TAF1				SIN3AK20	MXI1		SMC3	HDAC1		TAL1		HNF4A				MYC
	GATA3					STAT3				CEBPβ																SP2				ETS1				TFAP2A	ELF1		ZBTB7A	KDM5A		CHD1		PML				MAZ
	KDM5B					CREB1				CTCFL																SP1				ELF1				TCF12	CEBPβ		CEBPδ	FOSL1		BCL11A		NFIC				RAD21
	POLR2A					NFIC				RUNX3																WRNIP1				RELA				EP300	E2F4		KDM5B	ZNF263		ELF1		TCF3				YY1
	SIN3A					MAX				E2F6																SIX5				TBL1XR1				CHD2	IRF1			ELF1		TEAD4		HDAC2				TBP
	RELA					GABPA				ZBTB7A																EGR1				REST				SP4	RBBP5			ATF2		TRIM28		PHF8				SMC3
	KAP1					E2F1				PHF8																BHLHE40				YY1				KDM5B	KDM5B			HDAC1		POLR2A		HNF4G				ATF3
	MYC					FOS				POU2F2																ZNF143				ATF3				ZNF263	GABPA			ZNF263		PHF8		EBF1				TRIM28
	MAX					NRF1				HDAC1																PAX5				BCLAF1				RELA	CCNT2			ELF1		CEBPβ		EGR1				RCOR1
	CBX3					HSF1				POLR2A																E2F6				TEAD4				CHD1	POLR2A					REST		ZEB1				BCLAF1
	MXI1					RCOR1				RBBP5																RXRA				SPI1				NFIC	NFYA					RELA		YY1				ZNF143
	GTF2F1					JUND				KDM5B																EZH2				NRF1				E2F1	CHD2					MYBL2		POLR2A				PBX3
	IRF1					ELK1				SIN3AK20																MYBL2				PML				ZBTB7A	TCF7L2					GATA1		SIN3A				CTCFL
	JUND					E2F6				TFAP2A																FOXP2				TAF7				POLR2A	NFYB					E2F1		RELA				JUN
	TCF12					NFYB				TAF1																MAFK				CCNT2				PHF8	SP1					TCF7L2		EP300				TAL1
	GATA1					NFYA				MYC																USF2				RUNX3				SP4	RFX5					TFAP2C		MAZ				HDAC8
	GABPA					SP2				TFAP2C																USF1				SAP30				ZNF263	MAZ					SMARCB1		MXI1				GATA2
	WRNIP1					SP1				E2F1																POLR2A				PAX5				CHD1	FOS					FOXM1		HMGN3				JUND
	CTCF					SPI1				PML																MTA3				PHF8				NFIC	NRF1					TAF1		KDM5B				EP300
	FOXA1					IRF1				RELA																SIN3A				POU2F2				E2F1	IRF3					HDAC1		MYC				BACH1
	FOSL2					MAFK				RUNX3																NFIC				CHD1				ZBTB7A	MXI1					BCLAF1		MAX				POLR2A
	SPI1					ZKSCAN1				E2F6																GTF2F1				CTCF				E2F1	ELF1					JUND		TCF7L2				SIN3A
	YY1					SAP30				ZBTB7A																PHF8								POLR2A	CEBPβ					FOS		MYBL2				UBTF
	PML					RFX5				PHF8																SETDB1								TBP	IRF1					TBL1XR1		E2F6				SIN3AK20
	PHF8					SMARCB1				POU2F2																PML								E2F1	RBBP5					CBX3		KAP1				TAF1
	GATA3					ATF1				HDAC1																KAP1								POLR2A	KDM5B					EP300		STAT1				CTCF
	KDM5B					MXI1				YY1																TCF7L2								TBP	GABPA					NR2F2		E2F1				CBX3
						IRF3				MAX																MYC									CCNT2					STAT5A		GATA1				NR2F2
						JUN				ZNF263																GATA2									EGR1					CHD1		CHD1				ZBTB7A
						RELA				POLR2A																NFATC1									TAF1					EGR1		TBL1XR1				MAX
						GTF2F1				RBBP5																RELA									MAX					ZEB1		CTCF				MYC
						WRNIP1				E2F6																CBX3									HDAC1							RCOR1				MAZ
						SIN3A				PHF8																ZBTB33									TBP							NR2F2				RAD21
						TBP				HDAC1																WRNIP1									YY1							CCNT2				YY1
						SMARCC1				YY1																YY1									PAX5							ETS1				TBP
						TAF1				MAX																									SAP30							UBTF				SMC3
						SMC3				ZNF263																									FOXP2							BCL3				ATF3
						PML				POLR2A																									ETS1							ZBTB7A				TRIM28
						HMGN3				PHF8																									SIN3A							STAT5A				RCOR1
						RUNX3				YY1																									PHF8							PAX5				BCLAF1
						CBX3				MAX																									MYC							ELF1				ZNF143
						USF2				CEBPβ																									SIN3AK20							REST				PBX3
						USF1				TAF1																									TCF3							FOXP2				CTCFL
						HDAC1				POLR2A																									HDAC2							GABPA				JUN
						GATA1				YY1																									REST							RXRA				TAL1
						ATF3				MAX																									TAF7							PML				HDAC8
						TAF7				CEBPβ																									SRF							NFIC				GATA2
						HDAC2				TAF1																																HDAC2				JUND
						EGR1																																				PHF8				EP300
						POU2F2																																				EBF1				BACH1
						RAD21																																				EGR1				MAFK
						PHF8																																				ZEB1				JUNB
						CTCF																																				YY1				NFE2
						TCF12																																				RUNX3
						BHLHE40																																				STAT5A
						FOSL2																																				NFIC
						HNF4G																																				FOXA1
						CEBPδ																																				FOXA2
						KDM5B																																				RCOR1
						CHD1																																				USF1
																																										CTCF
																																										RCOR1
																																										USF1
																																										CTCF
[truncated: 31 more columns]
