# Supplementary material for: Human primitive brain displays negative mitochondrial-nuclear expression correlation of respiratory genes
Source: HighWire-hosted journal article supplement (doi:10.1101/gr.226324.117), 2018-06-14
Supplement: Supplemental_Table_S7.docx [file Supplemental_Table_S7.docx]

| Transcription Factor | nDNA OXPHOS genes' promoter coverage* (%) | Spearman's correlation-coefficient response (SCU) | p-value |
| --- | --- | --- | --- |
| POLR2A | 92.59 | 0.574848 | <1E-6 |
| PHF8 | 86.42 | 0.173793 | <1E-6 |
| MAZ | 81.48 | 0.055696 | 0.000002 |
| JUND | 72.84 | 0.042717 | 0.000273 |
| KDM5B | 69.14 | 0.043484 | <1E-6 |
| CREB1 | 65.43 | 0.042579 | <1E-6 |
| TBL1XR1 | 55.56 | 0.032961 | 0.000203 |
| CCNT2 | 53.09 | 0.035662 | 0.000034 |
| CEBPβ | 50.62 | 0.036093 | <1E-6 |
| TCF12 | 49.38 | 0.031816 | 0.000188 |
| BRCA1 | 40.74 | 0.033497 | 0.000016 |
| ZBTB33 | 39.51 | 0.053593 | <1E-6 |
| FOS | 35.80 | 0.036259 | 0.000022 |
| BCLAF1 | 29.63 | 0.038006 | 0.000270 |
| FOSL2 | 24.69 | 0.047823 | 0.000065 |

**Supplemental Table S7.** Statistically significant Spearman's rank correlation coefficient positively affecting TFs. * Candidate promoter regions.
